# Supplementary material for: Magnetic solid phase extraction based on graphene oxide/nanoscale zero-valent iron for the determination of tetracyclines in water and milk by using HPLC-MS/MS
Source: Royal Society of Chemistry journal article supplement (doi:10.1039/c7ra08203g), 2017-01-01
Supplement: c7ra08203g1.pdf [file c7ra08203g1.pdf]

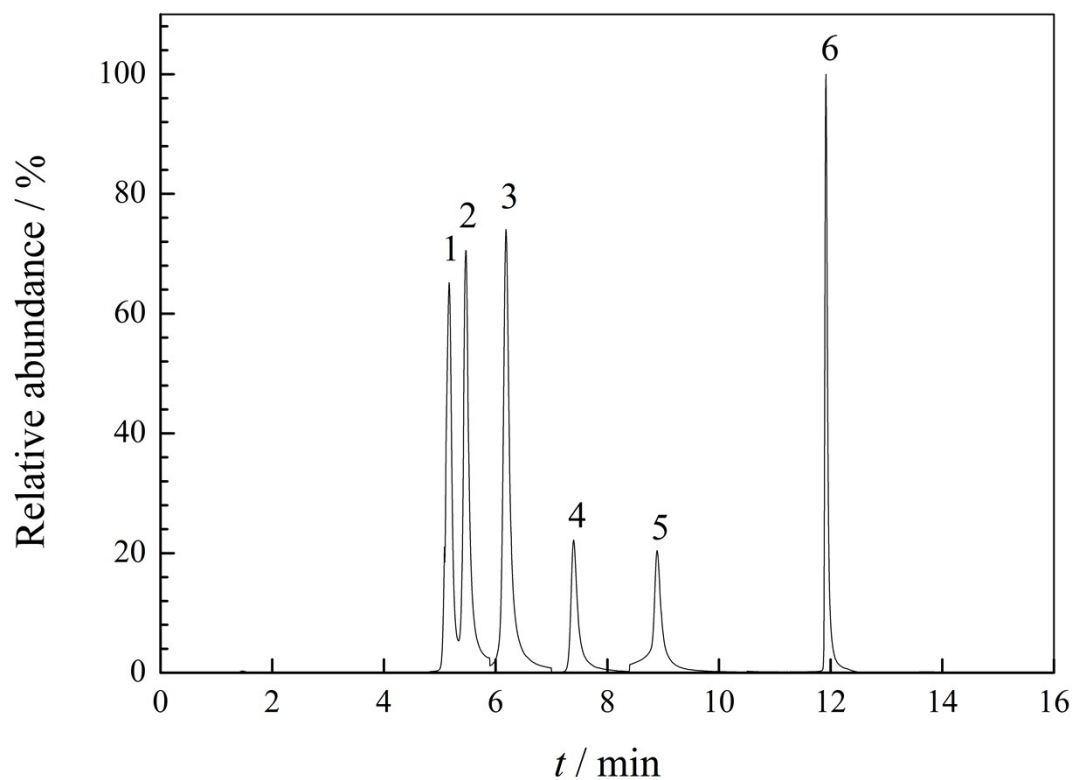

**Fig.S1** MRM chromatogram for the mixture of six TCs standard at  $50 \mu\text{g L}^{-1}$  in ESI mode. Peak identification: (1) ETC; (2) OTC; (3) TC; (4) DMC; (5) CTC; (6) ATC.

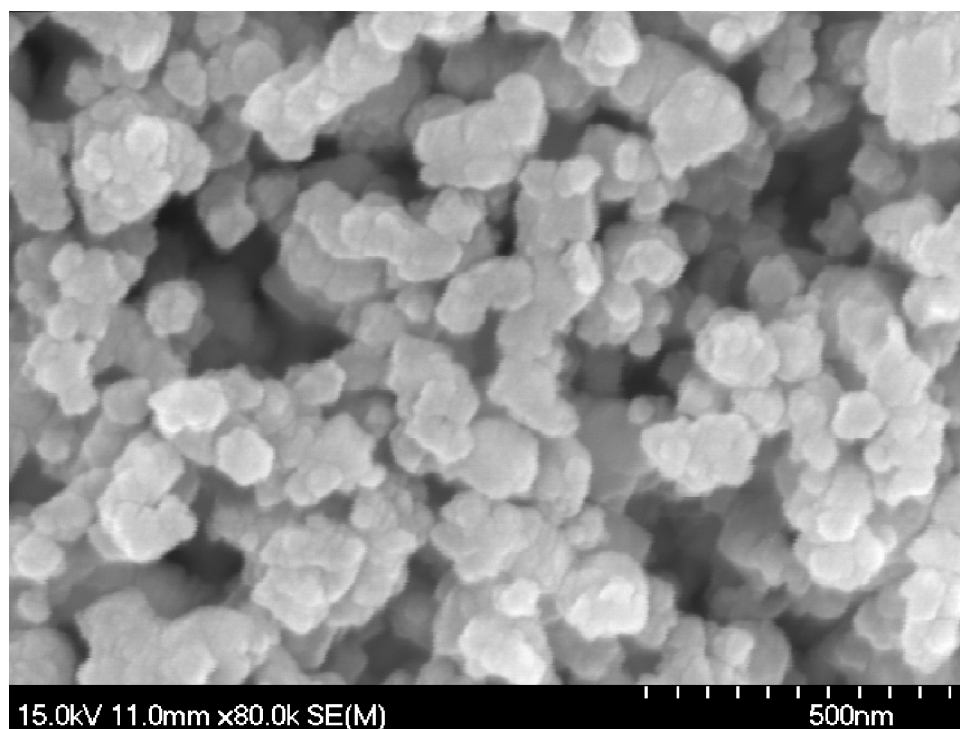

**Figure S2** SEM images of GO/nZVI.

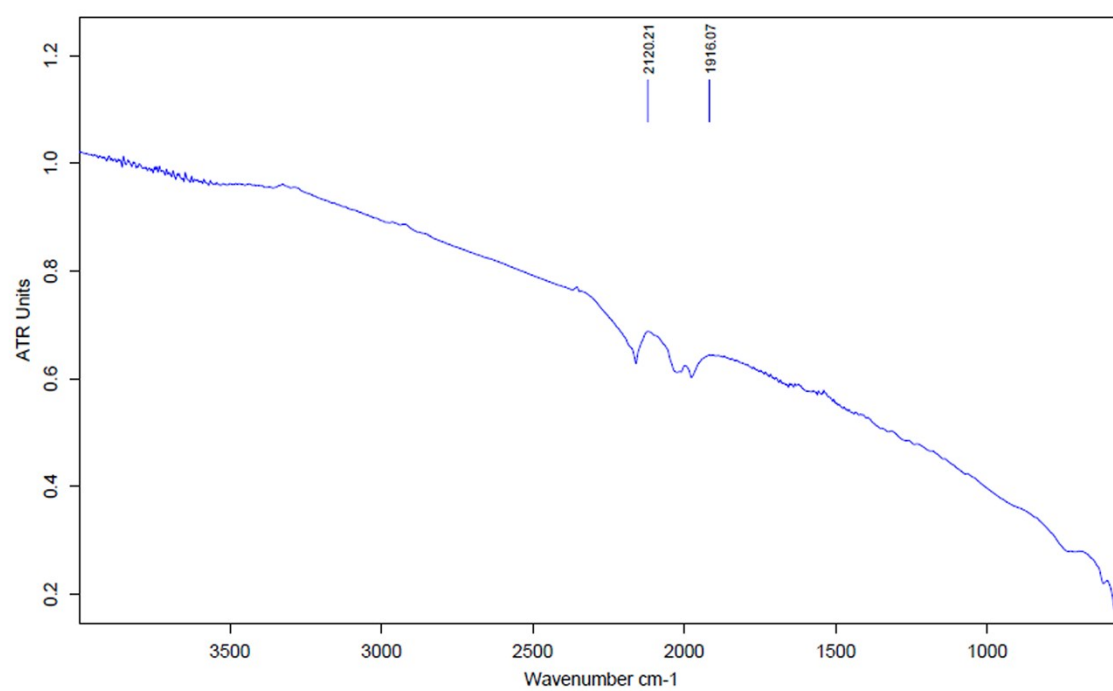

**Figure S3** FTIR spectra of GO/nZVI.

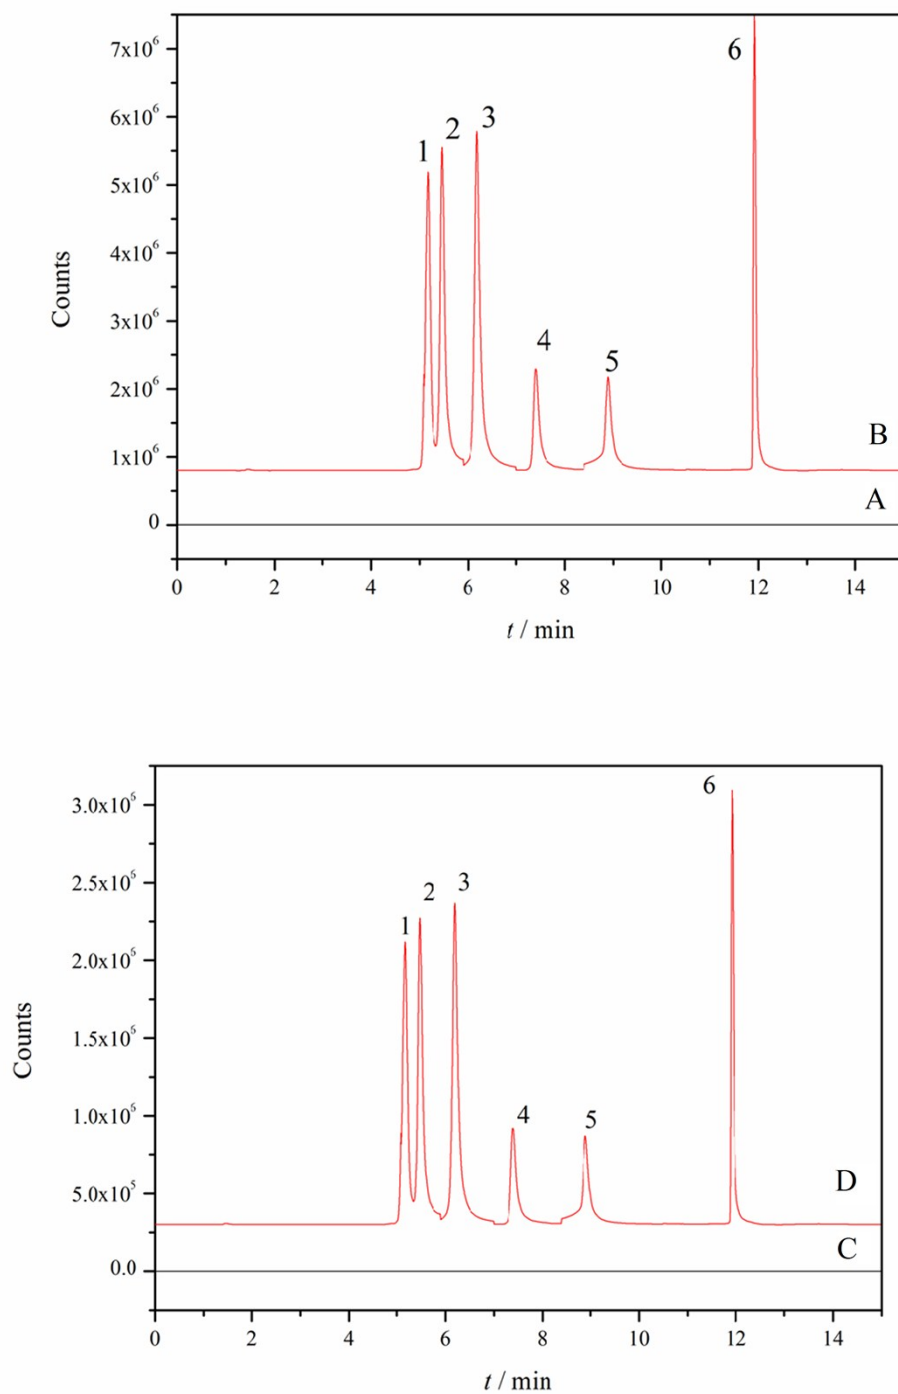

**Fig. S4** MRM chromatograms of the blank water sample (A), the blank water sample spiked with 20.0  $\mu\text{g L}^{-1}$  of TCs (B), the blank milk sample (C), and the blank milk sample spiked with 10.0  $\mu\text{g L}^{-1}$  of TCs (D). Peak identification: (1) ETC; (2) OTC; (3) TC; (4) DMC; (5) CTC; (6) ATC.
